# Supplementary material for: Mineral-Solubilizing Bacteria-Mediated Enzymatic Regulation and Nutrient Acquisition Benefit Cotton’s (Gossypium hirsutum L.) Vegetative and Reproductive Growth
Source: MDPI journal article supplement (doi:10.3390/microorganisms11040861), 2023-03-28
Supplement: s1 [file s1]

# Mineral-Solubilizing Bacteria-Mediated Enzymatic Regulation and Nutrient Acquisition Benefit Cotton's (*Gossypium hirsutum* L.) Vegetative and Reproductive Growth

Iqra Ahmad <sup>1</sup>, Maqshoof Ahmad <sup>1,\*</sup>, Bushra <sup>1</sup>, Azhar Hussain <sup>1</sup>, Muhammad Zahid Mumtaz <sup>2,\*</sup>, Najm-ul-Seher <sup>1</sup>, Ghulam Hassan Abbasi <sup>3</sup>, Farheen Nazli <sup>3</sup>, Lisa Pataczek <sup>4</sup> and Hayssam M. Ali <sup>5</sup>

<sup>1</sup> Department of Soil Science, The Islamia University of Bahawalpur, Bahawalpur 63100, Pakistan

<sup>2</sup> Institute of Molecular Biology and Biotechnology, The University of Lahore, Lahore 54000, Pakistan

<sup>3</sup> Institute of Agro-Industry and Environment, The Islamia University of Bahawalpur, Bahawalpur 63100, Pakistan

<sup>4</sup> Institute of Landscape and Plant Ecology, University of Hohenheim, Otilie-Zeller-Weg 2, 70599 Stuttgart, Germany

<sup>5</sup> Department of Botany and Microbiology, College of Science, King Saud University, Riyadh 11451, Saudi Arabia

\* Correspondence: maqshoof\_ahmad@yahoo.com (M.A.); zahidses@gmail.com (M.Z.M.)

## Supplementary data

**Supplementary Table S1.** Effect of PSB and ZSB strains inoculation on N, P, and K contents in soil.

| Treatment                                           | N content in soil (%) | P contents in soil (mg kg <sup>-1</sup> ) | K content in soil (mg kg <sup>-1</sup> ) |
|-----------------------------------------------------|-----------------------|-------------------------------------------|------------------------------------------|
| Absolute control                                    | 0.023 ± 0.0004 d      | 5.0 ± 0.10 f                              | 98.3 ± 1.69 e                            |
| Recommended NPK                                     | 0.024 ± 0.0005 c      | 5.2 ± 0.08 ef                             | 101.0 ± 1.86 de                          |
| <i>B. subtilis</i> IA6                              | 0.025 ± 0.0003 a-c    | 5.3 ± 0.08 c-e                            | 102.5 ± 1.96 c-e                         |
| <i>P. polymyxa</i> IA7                              | 0.025 ± 0.0003 bc     | 5.3 ± 0.08 de                             | 104.2 ± 1.60 b-d                         |
| <i>Bacillus</i> sp. IA16                            | 0.025 ± 0.0003 a-c    | 5.5 ± 0.10 a-d                            | 103.3 ± 1.82 cd                          |
| <i>B. aryabhattai</i> IA20                          | 0.025 ± 0.0004 a-c    | 5.4 ± 0.09 b-d                            | 104.3 ± 1.65 b-d                         |
| <i>B. subtilis</i> IA6 + <i>Bacillus</i> sp. IA16   | 0.026 ± 0.0004 ab     | 5.7 ± 0.10 a                              | 109.5 ± 1.61 a                           |
| <i>B. subtilis</i> IA6 + <i>B. aryabhattai</i> IA20 | 0.025 ± 0.0004 a-c    | 5.6 ± 0.05 ab                             | 108.3 ± 1.65 ab                          |
| <i>P. polymyxa</i> IA7 + <i>Bacillus</i> sp. IA16   | 0.025 ± 0.0003 a-c    | 5.6 ± 0.06 ab                             | 106.3 ± 1.86 a-c                         |
| <i>P. polymyxa</i> IA7 + <i>B. aryabhattai</i> IA20 | 0.026 ± 0.0003 a      | 5.5 ± 0.07 a-c                            | 105.8 ± 1.68 a-d                         |
| LSD (p ≤ 0.05)                                      | 0.001                 | 0.2322                                    |                                          |
